# Supplementary material for: Analysis of risk factors for pulmonary infection in adults with newly treated acute leukemia
Source: Research Square preprint supplement (doi:10.21203/rs.3.rs-8621539/v1), 2026-02-20
Supplement: Supplementary file 1 [file fafb24f0d9d6dad1f165a220.docx]

**Table 1**. univariate of adults with newly treated acute leukemia

| variables | Pulmonary infection cases(n=200) | Controls (n=51) | p-value |
| --- | --- | --- | --- |
| Age(year) | 55（45,64） | 59（48,65） | 0.405 |
| Male, n(%) | 112（56） | 23（45.1） | 0.163 |
| AL classification |  |  |  |
| AML | 155 | 34 | 0.109 |
| ALL | 45 | 17 |  |
| Smoking（%） | 74（37） | 8（15.7） | 0.004 |
| Hypertension（%） | 40（20） | 10（19.6） | 0.950 |
| diabetestan（%） | 24（12） | 5（9.8） | 0.661 |
| Placement of picc(%) | 116（58） | 26（50.9） | 0.367 |
| Corticosteroid treatment(%) | 72（36） | 22（43.1） | 0.347 |
| Administration of antibiotics prior to chemotherapy.(%) | 109（54.5） | 11（21.5） | ＜0.001 |
| Length of hospitalization (days) | 29（25,35） | 26（22,30） | 0.01 |
| Previous use chemotherapy of blood count |  |  |  |
| WBC | 17.47（5.08,55.48） | 21.48（5.29,76.82） | 0.258 |
| Hb | 72（59.0,86.0） | 70（50.0,88.0） | 0.614 |
| Platelet | 32（15.0,63.0） | 47（24.0,87.0） | 0.051 |
| Neutrophile | 1.39（0.39,4.79） | 3.17（1.53,6.50） | 0.003 |
| Blood count during chemotherapy |  |  |  |
| WBC | 0.38（0.21,0.68） | 1.10（0.60,1.64） | ＜0.001 |
| Hb | 54（49.0,61.0） | 57（46.0,61.0） | 0.315 |
| Platelet | 10（4.0,23.0） | 15（7.0,31.0） | 0.022 |
| Neutrophile | 0.02（0.01,0.11） | 0.25（0.06,0.61） | ＜0.001 |
| Lymphocyte(×10^12/L) | 0.28（0.17,0.41） | 0.59（0.29,0.84） | ＜0.001 |
| NLR | 0.12（0.03,0.35） | 0.35（0.10,0.90） | ＜0.001 |
| Albumin | 29.57（26.74,33.21） | 31.95（29.23,36.84） | 0.001 |
| C reactive protein | 88.31（56.87,127.79） | 28.20（8.26,47.94） | ＜0.001 |
| Pct(ng/ml) | 0.28（0.12,0.80） | 0.12（0,0.26） | ＜0.001 |
| Median Duration of neutropenia（days） | 17.47（5.08,55.48） | 4（0,11） | ＜0.001 |
| Disease status |  |  |  |
| In remission | 110 | 43 | ＜0.001 |
| Not in remission | 90 | 8 |  |

Table 2. Multivariate analysis of the risk factors for lung infection during induction chemotherapy among patients with newly diagnosed acute leukemia.

| variable | or | 95%CI | p-value |
| --- | --- | --- | --- |
| **Length of Stay** | 1.073 | 1.004—1.147 | 0.039 |
| Smoking | 2.931 | 0.122—0.952 | 0.040 |
| Previous use chemotherapy of blood count |  |  |  |
| Neutrophile | 1.015 | 0.984—1.048 | 0.343 |
| Previous use of Antibiotic treatment | 0.145 | 2.629—18.121 | ＜0.001 |
| Median Duration of neutropenia | 1.213 | 1.123—1.309 | ＜0.001 |
| Blood count during chemotherapy |  |  |  |
| WBC | 1.254 | 0.9—1.747 | 0.182 |
| Neutrophile | 1.038 | 0.212—5.078 | 0.963 |
| Lymphocyte(×10^12/L) | 0.518 | 0.216—1.239 | 0.139 |
| NLR | 1.133 | 0.523—2.457 | 0.751 |
| Platelet | 0.991 | 0.98—1.001 | 0.088 |
| Albumin | 1.054 | 0.986—1.126 | 0.120 |
| Not in remission | 4.406 | 1.556—12.475 | 0.005 |

*A P-value of < 0.05 was considered to be statistically significant. OR = odds ratio; CI = confidence interval.

Table 3. **Distribution of pathogens**

| Bacterial Distribution | n | percentage (%) |
| --- | --- | --- |
| **Gram-negative bacteria** |  |  |
| Klebsiella pneumoniae | 5 | 9.80% |
| Pseudomonas aeruginosa | 4 | 7.84% |
| Escherichia coli | 2 | 3.64% |
| Haemophilus influenzae | 1 | 1.82% |
| **Gram-positive bacteria** |  |  |
| Staphylococcus aureus | 3 | 5.45% |
| Streptococcus pneumoniae | 2 | 3.64% |
| Staphylococcus epidermidis | 2 | 3.64% |
| Staphylococcus capitis | 1 | 1.82% |
| **Fungal pathogens** |  |  |
| Aspergillus | 7 | 8.05% |
| Candida albicans | 1 | 1.15% |
| Candida Cruz | 1 | 1.15% |
| Candida tropical | 1 | 1.15% |
| Saccharomyces cerevisiae | 1 | 1.15% |
| Clinical diagnosis of fungi | 18 | 20.69% |
| Suspected fungal | 11 | 12.64% |
| **Viral pathogens** |  |  |
| Influenza virus | 7 | 8.05% |
| Severe acute respiratory syndrome coronavirus 2 (SARS-CoV-2) | 4 | 4.60% |
| Epstein-Barr virus (EBV) | 2 | 2.30% |
| **Mycoplasma pneumoniae** | 1 | 1.15% |
| **Mixed infection** |  |  |
| Novel coronavirus + Aspergillus | 10 | 11.49% |
| Aspergillus + human rhinovirus | 2 | 2.30% |
| Novel coronavirus + clinical diagnosis of fungi | 1 | 1.15% |
| Aspergillus + Staphylococcus epidermidis | 1 | 1.15% |
| Aspergillus + Pseudomonas aeruginosa | 1 | 1.15% |
